# Supplementary material for: HDAC3 is critical in tumor development and therapeutic resistance in Kras-mutant non–small cell lung cancer
Source: PubMed Central journal article supplement — Sci Adv. 2023 Mar 17;9(11):eadd3243. doi: 10.1126/sciadv.add3243 (PMC10022903; doi:10.1126/sciadv.add3243), 2023-03-17
Supplement: sciadv.add3243_sm.pdf [file sciadv.add3243_sm.pdf]

Supplementary Materials for  
**HDAC3 is critical in tumor development and therapeutic resistance in *Kras*-  
mutant non–small cell lung cancer**

Lillian J. Eichner *et al.*

Corresponding author: Reuben J. Shaw, shaw@salk.edu; Lillian J. Eichner, eichner@northwestern.edu

*Sci. Adv.* **9**, eadd3243 (2023)  
DOI: 10.1126/sciadv.add3243

**The PDF file includes:**

Figs. S1 to S5

**Other Supplementary Material for this manuscript includes the following:**

Table S1

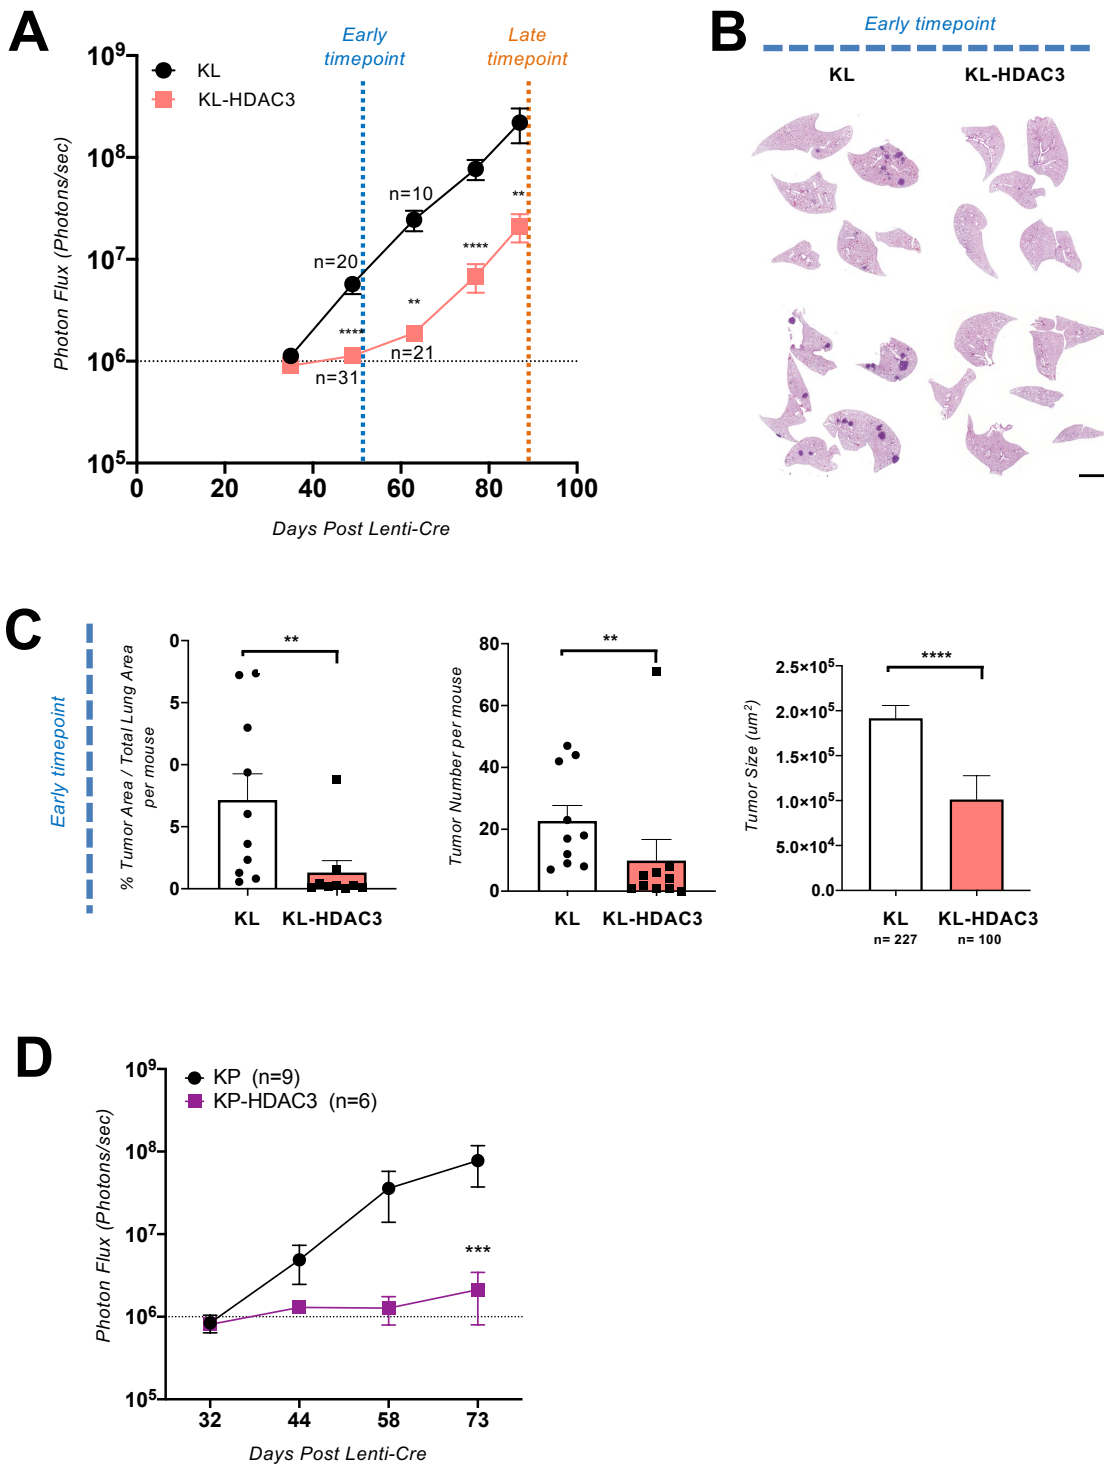

**Figure S1. HDAC3 deletion *in vivo* impairs tumor growth in KL and KP GEMM models of NSCLC**

(A) Average longitudinal BLI data from the *KL-HDAC3* experiment.

(B) Representative H&E-stained sections from the *KL-HDAC3* early timepoint. Scale bar 1000 $\mu\text{m}$ .

(C) Quantitation from H&E-stained sections from the early timepoint cohort: Tumor area as a percentage of total lung area per mouse (n=10), tumor number per mouse (n=10), and average tumor size (n=227 or 100 as indicated).

(D) Average longitudinal BLI data from the *KP-HDAC3* experiment.

Values are expressed as mean  $\pm$  s.e.m. \*\* p-value < 0.01, \*\*\* p-value < 0.001, \*\*\*\* p-value < 0.0001 determined by two-tailed Mann-Whitney test.

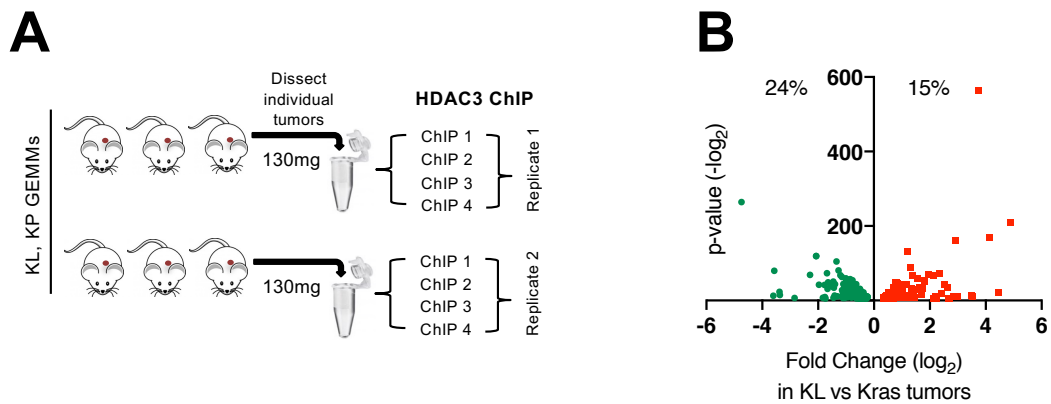

**Figure S2. HDAC3 genome occupancy in primary tumors.**

**(A)** Schematic of HDAC3 ChIP-seq experimental design in primary *KL* and *KP* tumors.

**(B)** Plot of RNA-seq differential expression between *KL* versus *Kras* primary tumors for the HDAC3 target genes in Figure 2A.

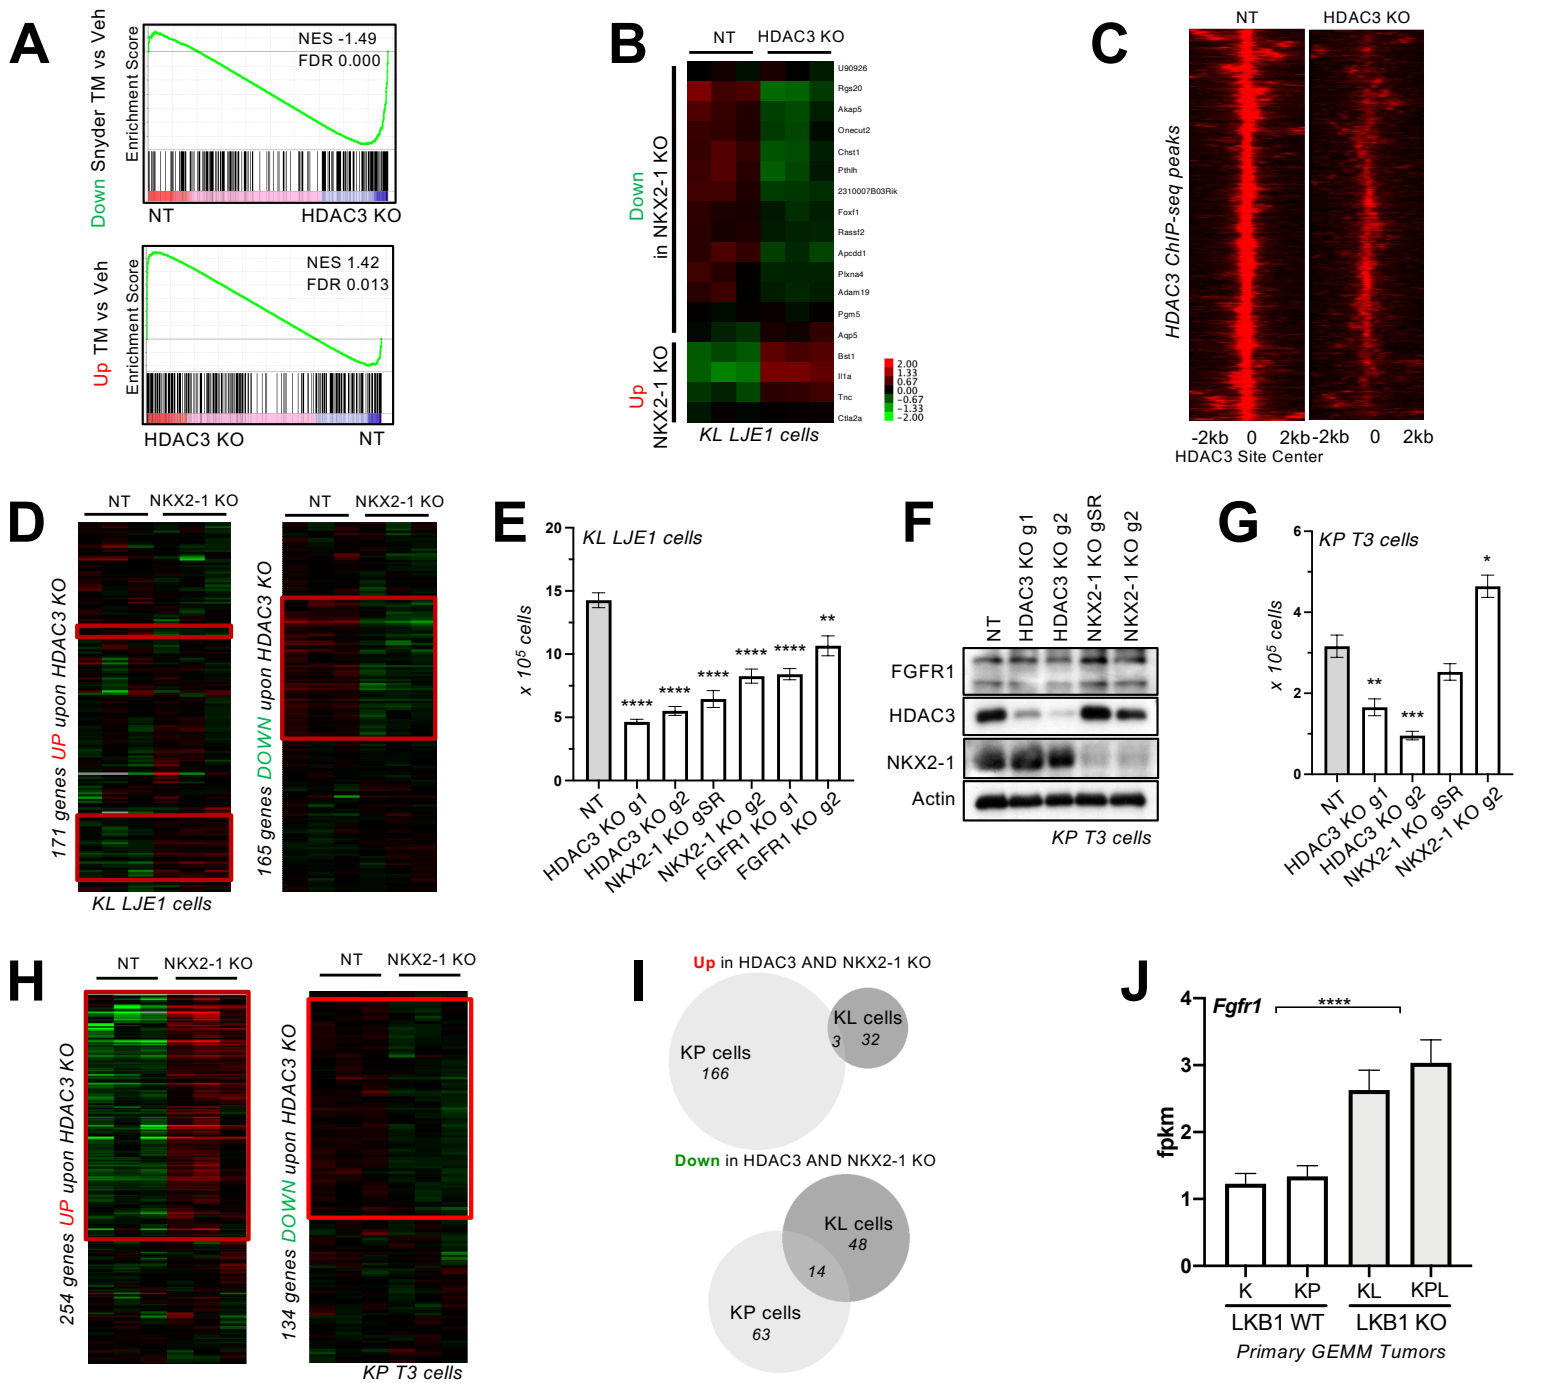

**Figure S3. HDAC3 and NKX2-1 regulate the expression of a common set of target genes.**

(A) GSEA plots for genes deregulated (downregulated, top plot; upregulated, bottom plot) upon tamoxifen (TM)-mediated *in vivo* deletion of *NKX2-1* in *Kras* tumors (Snyder et al. *Mol Cell*, 2013 (44)) queried across *HDAC3* KO RNA-seq data from KL LJE1 cells. NT, Non-Targeting control.

(B) Heatmap of RNA-seq data showing FPKM read counts from NT or *HDAC3* KO cells for genes deregulated upon *NKX2-1* KO (adj. p-value <0.05, fold +/-0.5) in KL LJE1 cells.

(C) 3,728 *HDAC3* ChIP-seq peaks identified in KL LJE1 NT cells. Peaks were called using Input from NT cells, and *HDAC3* ChIP-seq from *HDAC3* KO cells as background.

(D) Heatmap of RNA-seq data showing FPKM read counts from NT or *NKX2-1* KO KL LJE1 cells for the genes deregulated upon *HDAC3* KO (adj. p-value <0.05, fold +/-0.5).

(E) Proliferation assessment of KL LJE1 cells after 5 days (n=6).

(F) Western blot analysis from KP T3 cells.

(G) Proliferation assessment of KP T3 cells after 5 days (n=6).

(H) Heatmap of RNA-seq data showing FPKM read counts from NT or *NKX2-1* KO cells for the genes deregulated upon *HDAC3* KO (adj. p-value <0.05, fold +/-0.5) in KP T3 cells. 159/254 genes were strongly upregulated upon *HDAC3* KO or *NKX2-1* KO (red box, left), whereas 68/134 genes were mildly downregulated upon *HDAC3* KO or *NKX2-1* KO (red box, right).

(I) Overlap of genes significantly upregulated or downregulated upon both *HDAC3* KO and *NKX2-1* KO in KP T3 (KP) versus KL LJE1 (KL) cells.

(J) *Fgfr1* mRNA levels (FPKM) from RNA-seq data across *Kras* (K) (n=9), KP (n=8), KL (n=9), and KPL (n=15) primary tumor (n=8-15). Values are expressed as mean  $\pm$  s.e.m. \* p-value < 0.05, \*\* < 0.01, \*\*\* < 0.001, \*\*\*\* p-value < 0.0001 determined by two-tailed student's t-test.

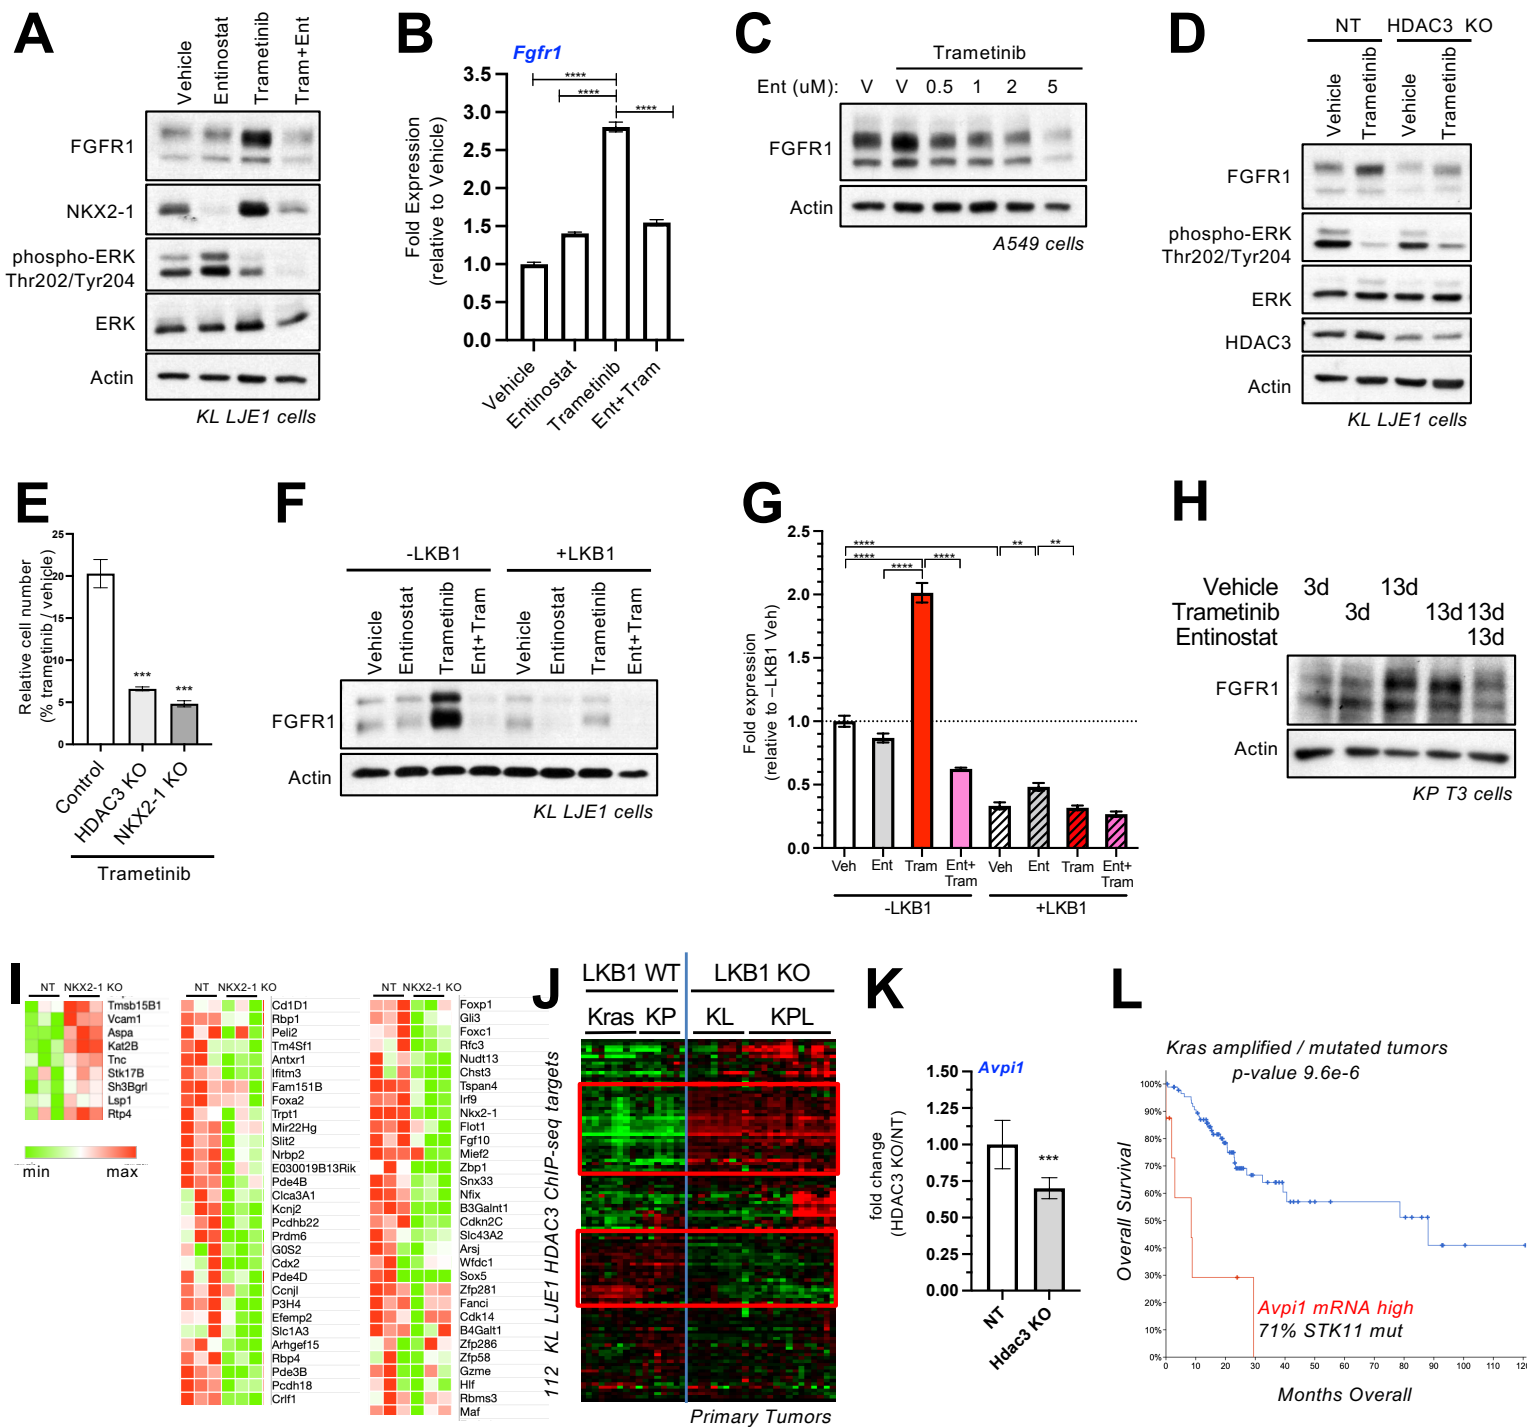

**Figure S4. HDAC3 and NKX2-1 common target genes are aberrantly engaged upon trametinib resistance**

(A) Western blot analysis from KL LJE1 cells treated with vehicle, 10nM trametinib, or 1uM entinostat for 13 days.

(B) qRT-PCR for *Fgfr1* mRNA expression in KL LJE1 cells treated as in (A) (n=3).

(C) Western blot analysis from human A549 cells treated for 9 days with vehicle (V) or 10nM trametinib, and during the last 6 days co-treated with V or entinostat (Ent) at the doses indicated.

(D) Western blot analysis of NT or *HDAC3* KO KL LJE1 cells treated with vehicle or 10nM trametinib for 10 days.

(E) Proliferation assessment after 6 days of treatment with vehicle or 10nM trametinib in NT, *HDAC3* KO, or *NKX2-1* KO KL LJE1 cells (n=6).

(F-G) Western blot (F) and qRT-PCR (G) analysis from cells with (+) or without (-) LKB1 re-expression treated for 13 days; 10nM trametinib (Tram), 1uM entinostat (Ent).

(H) Western blot analysis of protein lysates from KP T3 cells treated with vehicle, 10nM trametinib, or 1uM entinostat for 13 days.

(I) Heatmap of RNA-seq data showing FPKM read counts for TIER genes differentially expressed between NT or *NKX2-1* KO KL LJE1 cells.

(J) Heatmap of RNA-seq data showing FPKM read counts from *Kras* (n=9), *KP* (n=8), *KL* (n=9), and *KPL* (n=15) primary tumors for the 112 TIER genes which are HDAC3 ChIP-seq target genes (Figure 4E).

(K) qRT-PCR for *Avpi1* mRNA expression in KL LJE1 cells (n=3).

(L) Overall survival data from patients with *Kras* amplified or *G12*-mutant tumors, comparing tumors with (n=8) or without (n=92) high *AVPI1* mRNA expression in the Firehose Legacy LUAD TCGA dataset.

Values are expressed as mean  $\pm$  s.e.m. \*\* < 0.01. \*\*\* < 0.001. \*\*\*\* *p*-value < 0.0001 determined by two-tailed student's *t*-test.

**A**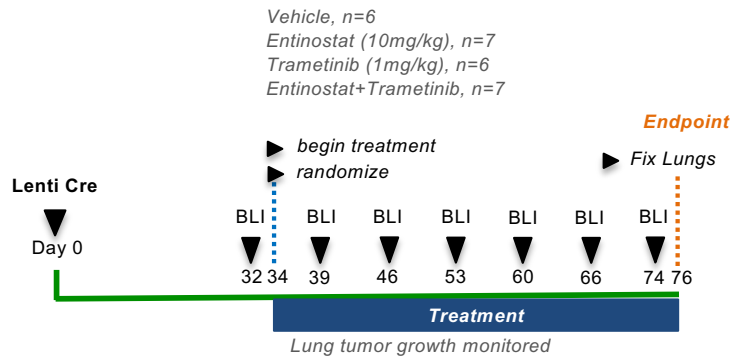

**Figure S5. *in vivo* trametinib plus entinostat combination treatment in *KL* NSCLC GEMM.**

**(A)** Schematic of experimental design. Lung tumors were initiated in *Kras*<sup>G12D/+</sup>, *LKB1*<sup>LL</sup> (*KL*) mice by Lenti-Cre administration and mice were imaged weekly (BLI) starting 4 weeks post-Lenti-Cre. Treatment was initiated 34 days post-Lenti-Cre. Mice were treated for 42 days with vehicle, entinostat (Ent, 10mg/kg), trametinib (Tram, 1mg/kg), or entinostat plus trametinib (Ent+Tram) administered by oral gavage.
